# Supplementary material for: Multi-generation gas-phase oxidation, equilibrium partitioning, and the formation and evolution of secondary organic aerosol
Source: Copernicus journal article supplement (doi:10.5194/acp-12-9505-2012), 2012-10-22
Supplement: Supplementary file 1 [file acp-12-9505-2012-supplement.pdf]

1 **Supplementary Information for “Multi-generation gas-phase**  
2 **oxidation, equilibrium partitioning, and the formation and evolution**  
3 **of secondary organic aerosol”**

4

5 **Christopher D. Cappa<sup>1</sup>, Kevin R. Wilson<sup>2</sup>**

6 [1] [Department of Civil and Environmental Engineering, University of California, Davis, CA  
7 95616]

8 [2] [Chemical Sciences Division, Lawrence Berkeley National Laboratory, Berkeley, CA 94720]

9 Correspondence to: C. D. Cappa (cdcappa@ucdavis.edu)

10

11 **1 OH Reaction Rate Coefficients**

12 **1.1 Structure-Reactivity Relationship**

13 As discussed in Kwok and Atkinson (1995), the rate coefficients for abstraction of a hydrogen  
14 atom from primary ( $-\text{CH}_3$ ), secondary ( $-\text{CH}_2-$ ) and tertiary ( $>\text{CH}-$ ) groups depends on the nature  
15 of the substituents attached to the carbon atom. They give generalized rate coefficients for these  
16 different carbon groups as:

17  $k(\text{CH}_3 - X) = k_{\text{prim}}f_x$  (S1.)

18  $k(X - \text{CH}_2 - Y) = k_{\text{sec}}f_xf_y$  (S2.)

19  $k(X - \text{CH} < \text{XZ}) = k_{\text{tert}}f_xf_yf_z$  (S3.)

1 where X, Y and Z represent different substituent groups,  $k_{prim}$ ,  $k_{sec}$  and  $k_{tert}$  are the “group” rate  
2 coefficients for the primary, secondary and tertiary groups and the  $f_x$ ,  $f_y$  and  $f_z$  are substituent-  
3 dependent modification factors for the rate coefficients. Kwok and Atkinson (1995) give values  
4 of the modification factors for a variety of functional group substituents, with  $f_{CH_3} = 1$ ,  $f_{CH_2} = f_{CH}$   
5  $= 1.23$ ,  $f_{>CO} = 0.75$ ,  $f_{OH} = 3.5$  and  $f_{CH_2C(O)} = 3.9$ , where  $f_{>CO}$  indicates an adjacent ketone,  $f_{CH_2C(O)}$   
6 indicates a ketone that is two carbons away and  $f_{OH}$  is for an alcohol.

7 For a given molecule, the total rate coefficient is the sum over the (substituent-specific) group  
8 rate coefficients for each carbon atom in the molecule, or

$$9 \quad k_{OH} = k(CH_3) + k(CH_2) + k(CH) = \sum_h k(CH_3)_h + \sum_i k(CH_2)_i + \sum_j k(CH)_j \quad (S4.)$$

10 and  $h$ ,  $i$  and  $j$  are the number of primary, secondary and tertiary carbon atoms in the molecule,  
11 respectively. Thus, for a straight-chain hydrocarbon with  $N_C$  carbon atoms,  $k_{OH}$  can be simply  
12 written as

$$13 \quad k_{OH} = 2k_{prim}f_{CH_2} + 2k_{sec}f_{CH_3}f_{CH_2} + (N_C - 4)k_{sec}(f_{CH_2})^2 \quad (S5.)$$

14 where  $f_{CH_3}$  and  $f_{CH_2}$  are the modification factor for  $CH_3$  and  $CH_2$  substituent groups, respectively,  
15 and where  $k_{prim} = 1.36 \times 10^{-13} \text{ cm}^3 \text{ molecules}^{-1} \text{ s}^{-1}$ ,  $k_{sec} = 9.34 \times 10^{-13} \text{ cm}^3 \text{ molecules}^{-1} \text{ s}^{-1}$ ,  $k_{tert} =$   
16  $1.94 \times 10^{-12} \text{ cm}^3 \text{ molecules}^{-1} \text{ s}^{-1}$  (Kwok and Atkinson, 1995).

## 17 **1.2 SOM-Reactivity Relationship**

18 Upon reaction with OH, oxygen-containing functional groups will be added. The types of  
19 functional groups that can be added include alcohols, ketones, aldehydes, carboxylic acids,  
20 organic nitrates and peroxides, among others. The SOM, does not track explicitly the type of

1 functional group added, only the number of oxygen atoms added (with an assumption of some  
2 relationship between volatility and the nature of the functional group added). It is therefore not  
3 possible to make direct use of the structure-reactivity relationships of Kwok and Atkinson (1995)  
4 within the SOM framework, and therefore a new, approximate parameterization must be  
5 developed.

6 To develop a “structure”-reactivity relationship that is appropriate for the SOM we make the  
7 simplifying assumption that only ketone and alcohol functionalities are added. Also, we make  
8 the assumption that oxygen is added to all CH<sub>2</sub> groups before it is added to CH<sub>3</sub> groups and that  
9 all carbon atoms (i.e. CH<sub>2</sub> and CH<sub>3</sub> groups) add at least one oxygen-containing functional group  
10 before a second functional group is added to any specific carbon atom. In very general terms, the  
11 addition of an alcohol group increases the reactivity of a molecule by increasing the reactivity of  
12 the carbon atom to which the alcohol group is attached. The addition of a ketone group decreases  
13 slightly the reactivity of the carbon atom adjacent to the ketone group but increases the reactivity  
14 of the carbon atom that is two carbons away, as is clear from comparison of the  $f_{>CO}$  and  $f_{CH_2(CO)}$   
15 modification factors.

16 Equation S5 gives the reactivity for the parent hydrocarbon. The SOM requires that we specify  
17 the reactivity of all product species. First, consider a limiting case of only alcohol addition, but  
18 where  $N_C - N_O \geq 2$ . In this case, the reactivity of the molecule after alcohol addition is  
19 approximately:

$$20 \quad k_{OH} \sim 2k_{prim}f_{CH_2} + (N_C - 2 - N_O)k_{sec}f_{CH_2}^2 + N_O k_{tert}f_{OH}f_{CH_2}f_{CH_2} \quad (S6.)$$

1 where we have made use of the relationship  $f_{\text{CH}_2} = f_{\text{CH}}$  and have treated all  $\text{CH}_2$  groups the same  
2 for simplicity. The result is that alcohol addition leads to an increase in the overall reactivity of a  
3 molecule.

4 What happens instead if only ketone groups are added? Ketone groups affect not only the  
5 reactivity of the adjacent carbon atoms, but also those atoms that are two carbons away. As the  
6 number of ketone groups increases, the number of possible isomers increases, making it  
7 impossible to come up with a general solution (note that the same is true for alcohol addition, but  
8 since alcohol groups only influence the reactivity of the carbon to which the alcohol is added and  
9 the adjacent carbon, the challenge is not quite so acute). Nonetheless, some generalizations can  
10 nonetheless be made: (1) the number of CH's with adjacent  $\text{CH}_2$  groups decreases approximately  
11 linearly with ketone addition, (2) the number of CH's with adjacent ketone groups increases  
12 approximately linearly with ketone addition, and (3) the number of CH's with ketone groups two  
13 carbons away and without an adjacent ketone group decreases once the number of ketones is  
14  $\sim$ half the number of carbon atoms. To account for these different situations, we introduce two  
15 parameters,  $a$  and  $b$ , where:

$$16 \quad a = \frac{N_O}{N_C - 2} \tag{S7.}$$

17 and

$$18 \quad b = 1 - \frac{\left| \frac{N_C - 2}{2} - N_O \right|}{\frac{N_C - 2}{2}} \text{ if } N_O > \frac{N_C - 2}{2}, \text{ else } b = 1 \tag{S8.}$$

1 Here,  $N_C - 2$  is used as the reference case (instead of  $N_C$ ) because only the case where  $N_O \leq N_C -$   
 2 2 is currently being considered. The parameter  $a$  increases linearly with oxygen addition whereas  
 3 the parameter  $b$  is unity until  $0.5(N_C - 2) = N_O$ , after which it decreases towards zero. The total  
 4 reactivity then evolves approximately as:

$$5 \quad k_{OH} \sim 2k_{prim} \left[ (1 - a)f_{CH_2} + a \left( \frac{f_{>CO} + f_{CH_2C(O)}}{2} \right) \right]$$

$$6 \quad + (N_C - 2 - N_O)k_{sec} \left[ (1 - a)f_{CH_2}f_{CH_2} + a \left( \frac{bf_{>CO}f_{CH_2C(O)} + f_{>CO}f_{CH_2} + bf_{CH_2}f_{CH_2C(O)}}{2b+1} \right) \right] \quad (S9.)$$

7  
 8 The above alcohol-only and ketone-only cases provide some understanding of how the reactivity  
 9 of the hydrocarbon evolves as oxygen is added. However, as our base case we make the  
 10 simplifying assumption that equal numbers of ketone and alcohol groups are added. Combining  
 11 the alcohol-only and ketone-only expressions, the following is obtained for the *approximate*  
 12 variation of  $k_{OH}$  with oxygen addition:

$$13 \quad k_{OH} \sim 2k_{prim} \left[ (1 - a)f_{CH_2} + a \left( \frac{f_{>CO} + f_{CH_2C(O)} + f_{OH}}{3} \right) \right]$$

$$14 \quad + (N_C - 2 - N_O)k_{sec} \left[ (1 - a)f_{CH_2}f_{CH_2} + a \left( \frac{bf_{>CO}f_{CH_2C(O)} + f_{>CO}f_{CH_2} + bf_{CH_2}f_{CH_2C(O)}}{2b+1} \right) \right]$$

$$15 \quad + 0.5N_Ok_{tert} \left[ (1 - a)f_{OH}f_{CH_2}^2 + af_{OH} \left( \frac{f_{>CO} + bf_{CH_2C(O)} + f_{CH}}{b+2} \right)^2 \right] \quad (S10.)$$

16  
 17 Equation 10 is the general expression that is used in the SOM to calculate the reactivity of all  
 18 species when  $N_O \leq N_C - 2$ . As an example, consider the predicted  $k_{OH}$  values for  $C_6$  species  
 19 relative to observations. The measured  $k_{OH}$  for hexane ( $C_6H_{14}$ ), 2-hexanol ( $C_6H_{14}O$ ) and  
 20 hexanone ( $C_6H_{12}O$ ) are  $5.2 \times 10^{-12}$ ,  $1.21 \times 10^{-11}$  and  $8.06 \times 10^{-12} \text{ cm}^3 \text{ molecule}^{-1} \text{ s}^{-1}$ , respectively, and  
 21 where the hexanone value is the average of 2-hexanone and 3-hexanone (Atkinson et al.,

1 1982; Wallington et al., 1988; Atkinson, 2003). The average of the ketone and alcohol-containing  
 2 species  $k_{OH}$  values is  $9.14 \times 10^{-2} \text{ cm}^3 \text{ molecules}^{-1} \text{ s}^{-1}$ . The Atkinson structure-reactivity relationship  
 3 predicts values of  $k_{OH}$  for hexane, 2-hexanol, 2-hexanone and 3-hexanone of  $5.46 \times 10^{-12}$ ,  
 4  $1.27 \times 10^{-11}$ ,  $8.17 \times 10^{-12}$  and  $7.89 \times 10^{-12} \text{ cm}^3 \text{ molecules}^{-1} \text{ s}^{-1}$ , giving an average  $k_{OH}$  for molecules  
 5 with one oxygen (either ketone or alcohol) of  $1.04 \times 10^{-11} \text{ cm}^3 \text{ molecules}^{-1} \text{ s}^{-1}$ . For comparison, the  
 6 SOM  $k_{OH}$  values for  $C_6$  and for  $C_6O$  are  $5.45 \times 10^{-12}$  and  $1.17 \times 10^{-11} \text{ cm}^3 \text{ molecule}^{-1} \text{ s}^{-1}$ , which  
 7 differ from the measured values by 5% and 28%, respectively and are in very good agreement  
 8 with the values derived using the Atkinson structure-reactivity relationship. A few further  
 9 examples are shown in Section 1.2 to illustrate that Eq. S8 provides reasonable  $k_{OH}$  values (at  
 10 least under the assumption that equal numbers of ketones and alcohol groups are added).

11 Equation S12 was developed for the case  $N_C - N_O \geq 2$ . As more oxygen atoms are added (again  
 12 assuming equal addition of alcohols and ketones), a modified expression is required. Since we  
 13 have made the simplifying assume that all carbon atoms add one oxygen before any carbon can  
 14 add two oxygens, when  $N_C - N_O > 2$  there are no longer any secondary carbon atoms to react  
 15 (since we also assumed the oxygen is preferentially added to  $CH_2$  groups over  $CH_3$  groups).  
 16 Thus, when  $N_C - 1 = N_O$ :

$$\begin{aligned}
 17 \quad k_{OH} \sim & k_{prim} \left[ \frac{f_{>CO} + f_{CH_2C(O)} + f_{OH}}{3} \right] \\
 18 \quad & + 0.5 k_{sec} \left[ f_{OH} \frac{(f_{>CO} + f_{CH_2C(O)} + f_{CH})}{3} \right] + 0.5 N_O k_{tert} \left[ f_{OH} \left( \frac{f_{>CO} + f_{CH}}{2} \right)^2 \right] \quad (S11.)
 \end{aligned}$$

19  
 20 And when  $N_C = N_O$

$$k_{OH} \sim k_{sec} \left[ f_{OH} \frac{(f_{>CO} + f_{CH_2C(O)} + f_{CH})}{3} \right] + 0.5N_O k_{tert} \left[ f_{OH} \left( \frac{f_{>CO} + f_{CH}}{2} \right)^2 \right] \quad (S12.)$$

As even more oxygen atoms are added, such that each carbon atom can now have multiple oxygen atoms, the reactivity will decrease because the number of hydrogen atoms available for abstraction will decrease (where we are neglecting the abstraction of hydrogen atoms from alcohol groups). With these assumptions, when  $2N_C = N_O$  the reactivity will drop to zero and it will decrease linearly with  $N_O$  from the reactivity at  $N_C = N_O$ . Thus, when  $N_O > N_C$ :

$$k_{OH} \sim 0.5N_O k_{tert} \left[ f_{OH} \left( \frac{f_{>CO} + f_{CH}}{2} \right)^2 \right] \left( 1 - \frac{N_O}{2N_C} \right) \quad (S13.)$$

Equations S10-S13 define a “structure”-reactivity relationship that is appropriate for use in the SOM, termed the SOM-reactivity relationship. The rate coefficients determined from the SOM-reactivity relationship are shown in Figure S1 and explicitly illustrate how the calculated rate coefficients vary with the number of carbon atoms in the parent atom, the absolute number of oxygen atoms and the O:C ratio. For larger  $N_C$  compounds, the variations of  $k_{OH}$  with O:C are similar. However, as  $N_C$  decreases the calculated  $k_{OH}$  values increase more steeply with O:C. Similarly, the increase in  $k_{OH}$  per oxygen atom added is greater for smaller  $N_C$  compounds. Noting that the y-axis in Figure S1 is logarithmic, this is in large part the reason for the relatively flat aerosol yield with  $N_C$  when  $N_C < \sim 12$  for the case when fragmentation is not included in the SOM (c.f. Figure 2c in the main text).

1 Not considered in the SOM-reactivity formulation is the influence of nitrogen containing groups  
2 on reactivity. In general, the presence of  $-\text{NO}_2$  or  $-\text{ONO}_2$  groups leads to a substantial decrease  
3 in the reactivity of a molecule, affecting both the reactivity of the CH to which the nitrogen  
4 group is bonded as well as the reactivity of the adjacent CH's. Thus, when organic nitrates are  
5 formed (which can occur during reactions under high  $\text{NO}_x$  conditions), the SOM-reactivity  
6 relationship may over-estimate the reactivity of the product molecules. If the  $k_{\text{OH}}$  values for the  
7 product species are over-estimated, the best-fit  $\Delta\text{LVP}$  may be somewhat lower or the  
8 fragmentation probability somewhat higher than if a more appropriate  $k_{\text{OH}}$  matrix were used.  
9 However, this is unlikely to affect the ability of the SOM to be fit to laboratory observations of  
10 SOA growth.

### 11 **1.3 Structure-Reactivity vs. SOM-Reactivity Example: Dodecane + 4 oxygens**

12 Here,  $k_{\text{OH}}$  values for five different isomers of a  $\text{C}_{12}$  compound (i.e. dodecane,  $\text{CH}_3(\text{CH}_2)_{10}\text{CH}_3$ )  
13 that all contain 4 oxygen functional groups are calculated using the Atkinson structure-reactivity  
14 relationship and compared with the SOM-reactivity  $k_{\text{OH}}$  values. In all cases, we consider only  
15 isomers in which equal numbers of ketones and alcohols have been added, consistent with the  
16 SOM-reactivity relationship derivation. Since the SOM provides an average representation of the  
17 reactivity, it is most appropriate to compare the *average*  $k_{\text{OH}}$  derived from the  $k_{\text{OH}}$  values of the  
18 individual isomers with the SOM  $k_{\text{OH}}$ , as will be done in Section 1.3.6.

#### 19 **1.3.1 Case 1**

20 One possible  $\text{C}_{12}\text{O}_4$  isomer is:



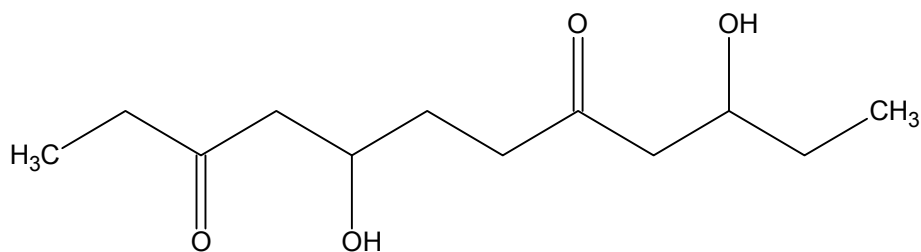

2 The  $k_{OH}$ , using the explicit Atkinson structure-reactivity relationships for this molecule, is:

$$\begin{aligned}
 k_{OH} = & k_{prim}f_{CH_2C(O)} + k_{sec}f_{CH_3f_{>CO}} + k_{sec}f_{>CO}f_{CH} + k_{tert}f_{CH_2C(O)}f_{OH}f_{CH_2} + k_{sec}f_{CH}f_{CH_2C(O)} \\
 & + k_{sec}f_{>CO}f_{CH} + k_{sec}f_{<CO}f_{CH} + k_{tert}f_{CH_2C(O)}f_{OH}f_{CH_2} + k_{sec}f_{CH_2}f_{CH_3} \\
 & + k_{prim}f_{CH_2}
 \end{aligned}$$

3 which gives  $k_{OH} = 7.46 \times 10^{-11} \text{ cm}^3 \text{ molecule}^{-1} \text{ s}^{-1}$ . This can be compared to the  $k_{OH}$  from the  
 4 SOM-reactivity relationship developed above, which for  $C_{12}O_4$  gives  $4.38 \times 10^{-11} \text{ cm}^3 \text{ molecule}^{-1}$   
 5  $s^{-1}$ .

### 6 1.3.2 Case 2

7 Another  $C_{12}O_4$  isomer is considered:

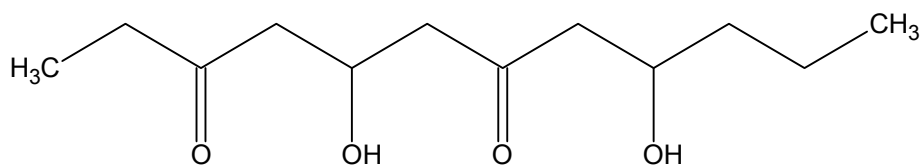

9 The  $k_{OH}$  using the explicit Atkinson structure-reactivity relationships for this molecule is:

$$\begin{aligned}
k_{OH} = & k_{prim}f_{CH_2C(O)} + k_{sec}f_{CH_3f_{>CO}} + k_{sec}f_{>CO}f_{CH} + k_{tert}f_{CH_2C(O)}f_{OH}f_{CH_2C(O)} \\
& + k_{sec}f_{CHF_{>CO}} + k_{sec}f_{>CO}f_{CH} + k_{tert}f_{CH_2C(O)}f_{OH}f_{CH_2} + k_{sec}f_{CHF_{CH_2}} \\
& + k_{sec}f_{CH_2}f_{CH_3} + k_{prim}f_{CH_2}
\end{aligned}$$

1 which gives  $k_{OH} = 1.42 \times 10^{-10} \text{ cm}^3 \text{ molecule}^{-1} \text{ s}^{-1}$ , compared to the SOM-reactivity value of  
 2  $4.38 \times 10^{-11} \text{ cm}^3 \text{ molecule}^{-1} \text{ s}^{-1}$  for a generic  $C_{12}O_4$  species.

### 3 1.3.3 Case 3:

4 Another  $C_{12}O_4$  isomer is considered:

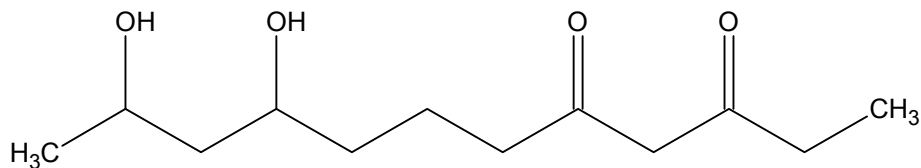

6 The  $k_{OH}$  using the explicit structure-reactivity relationships for this molecule would be:

$$\begin{aligned}
k_{OH} = & k_{prim}f_{CH} + k_{tert}f_{CH_3}f_{CH_2}f_{OH} + k_{sec}f_{CHF_{CH}} + k_{tert}f_{CH_2}f_{CH_2}f_{OH} + k_{sec}f_{CHF_{CH_2}} \\
& + k_{sec}f_{CH_2C(O)}f_{CH_2} + k_{sec}f_{CHF_{>CO}} + k_{sec}f_{>CO}f_{>CO} + k_{sec}f_{>CO}f_{CH_3} \\
& + k_{prim}f_{CH_2C(O)}
\end{aligned}$$

7 which gives  $k_{OH} = 2.87 \times 10^{-11} \text{ cm}^3 \text{ molecule}^{-1} \text{ s}^{-1}$ , compared to the SOM-reactivity value of  
 8  $4.38 \times 10^{-11} \text{ cm}^3 \text{ molecule}^{-1} \text{ s}^{-1}$  for a generic  $C_{12}O_4$  species.

### 9 1.3.4 Case 4:

10 Another  $C_{12}O_4$  species is considered:

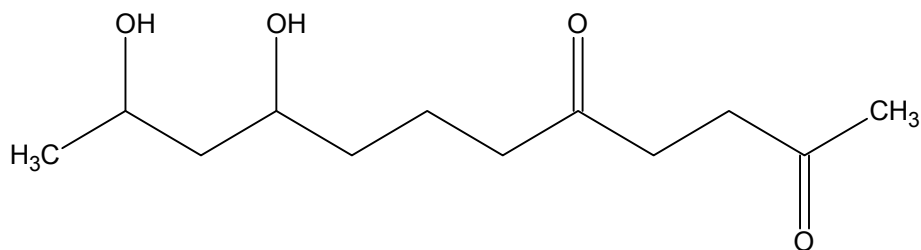

2 The  $k_{OH}$  using the explicit structure-reactivity relationships for this molecule would be:

$$\begin{aligned}
 k_{OH} = & k_{prim}f_{CH} + k_{tert}f_{CH_3}f_{CH_2}f_{OH} + k_{sec}f_{CH}f_{CH} + k_{tert}f_{CH_2}f_{CH_2}f_{OH} + k_{sec}f_{CH}f_{CH_2} \\
 & + k_{sec}f_{CH_2C(O)}f_{CH_2} + k_{sec}f_{CH_2}f_{>CO} + k_{sec}f_{>CO}f_{CH_2C(O)} + k_{sec}f_{>CO}f_{CH_2C(O)} \\
 & + k_{prim}f_{>CO}
 \end{aligned}$$

3 which gives  $k_{OH} = 3.25 \times 10^{-11} \text{ cm}^3 \text{ molecule}^{-1} \text{ s}^{-1}$ , compared to the SOM-reactivity value of  
 4  $4.38 \times 10^{-11} \text{ cm}^3 \text{ molecule}^{-1} \text{ s}^{-1}$  for a generic  $C_{12}O_4$  species.

### 5 1.3.5 Case 5:

6 Another  $C_{12}O_4$  species is considered:

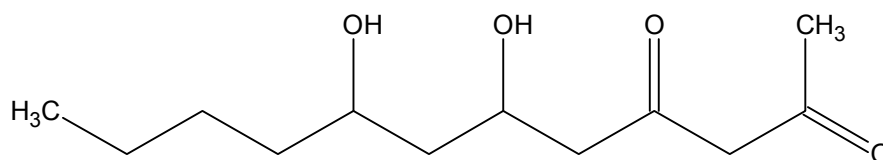

8 The  $k_{OH}$  using the explicit structure-reactivity relationships for this molecule would be:

$$\begin{aligned}
 k_{OH} = & k_{prim}f_{CH} + k_{sec}f_{CH_3}f_{CH_2} + k_{sec}f_{CH_2}f_{CH_2} + k_{sec}f_{CH_2}f_{CH_2} + k_{tert}f_{CH_2}f_{CH_2}f_{OH} \\
 & + k_{sec}f_{CH}f_{CH} + k_{tert}f_{CH_2}f_{OH}f_{CH_2C(O)} + k_{sec}f_{>CO}f_{CH} + k_{sec}f_{>CO}f_{>CO} \\
 & + k_{prim}f_{>CO}
 \end{aligned}$$

1 which gives  $k_{\text{OH}} = 4.99 \times 10^{-11} \text{ cm}^3 \text{ molecule}^{-1} \text{ s}^{-1}$ , compared to the SOM-reactivity value of  
2  $4.38 \times 10^{-11} \text{ cm}^3 \text{ molecule}^{-1} \text{ s}^{-1}$  for a generic  $\text{C}_{12}\text{O}_4$  species.

### 3 **1.3.6 Average Results**

4 Comparing cases 1-5, the extent to which the SOM-reactivity relationship yields a  $k_{\text{OH}}$  that  
5 agrees with the explicit calculation depends on the structure of the molecule under consideration.  
6 The calculated SOM  $k_{\text{OH}}$  can either over-predict or under-predict the  $k_{\text{OH}}$  for the individual  
7 isomers, as would be expected since the SOM-reactivity parameterization assumes mean  
8 properties for all CH groups. Overall, the SOM-reactivity relationship does a reasonable job in  
9 estimating the reactivity of the *average* species, with the average  $k_{\text{OH}}$  for these five species  
10  $6.56 \times 10^{-11} \text{ cm}^3 \text{ molecules}^{-1} \text{ s}^{-1}$  compared with the SOM  $k_{\text{OH}} = 4.38 \times 10^{-11} \text{ cm}^3 \text{ molecules}^{-1} \text{ s}^{-1}$ ,  
11 giving a ratio between the SOM  $k_{\text{OH}}$  and the average  $k_{\text{OH}}$  of 0.67. Note that for the  $\text{C}_6$  species  
12 considered above, the SOM actually slightly over-predicted compared to the measured and the  
13 values derived from the Atkinson structure-reactivity relationship. This suggests that, within the  
14 constraints imposed by the fundamental assumptions underpinning the SOM-reactivity  
15 relationship, the  $k_{\text{OH}}$  for the oxygenated species will be within a factor of 2 of the average from  
16 the Atkinson relationship.

### 17 18 **References**

19 Atkinson, R., Aschmann, S. M., Carter, W. P. L., and Pitts, J. N.: Rate constants for the gas-phase  
20 reaction of OH radicals with a series of ketones at 299 +/- 2 K, International Journal of Chemical Kinetics,  
21 14, 839-847, 10.1002/kin.550140804, 1982.

1 Atkinson, R.: Kinetics of the gas-phase reactions of OH radicals with alkanes and cycloalkanes, *Atmos.*  
2 *Chem. Phys.*, 3, 2233-2307, 10.5194/acp-3-2233-2003, 2003.

3 Kwok, E. S. C., and Atkinson, R.: Estimation of hydroxyl radical reaction rate constants for gas-phase  
4 organic compounds using a structure-reactivity relationship: An update, *Atmos. Environ.*, 29, 1685-1695,  
5 10.1016/1352-2310(95)00069-b, 1995.

6 Wallington, T. J., Dagaut, P., Liu, R. Z., and Kurylo, M. J.: Rate constants for the gas-phase reactions of  
7 OH with C5 through C7 aliphatic-alcohols and ethers - predicted and experimental values, *International*  
8 *Journal of Chemical Kinetics*, 20, 541-547, 10.1002/kin.550200704, 1988.

9

10

11

12

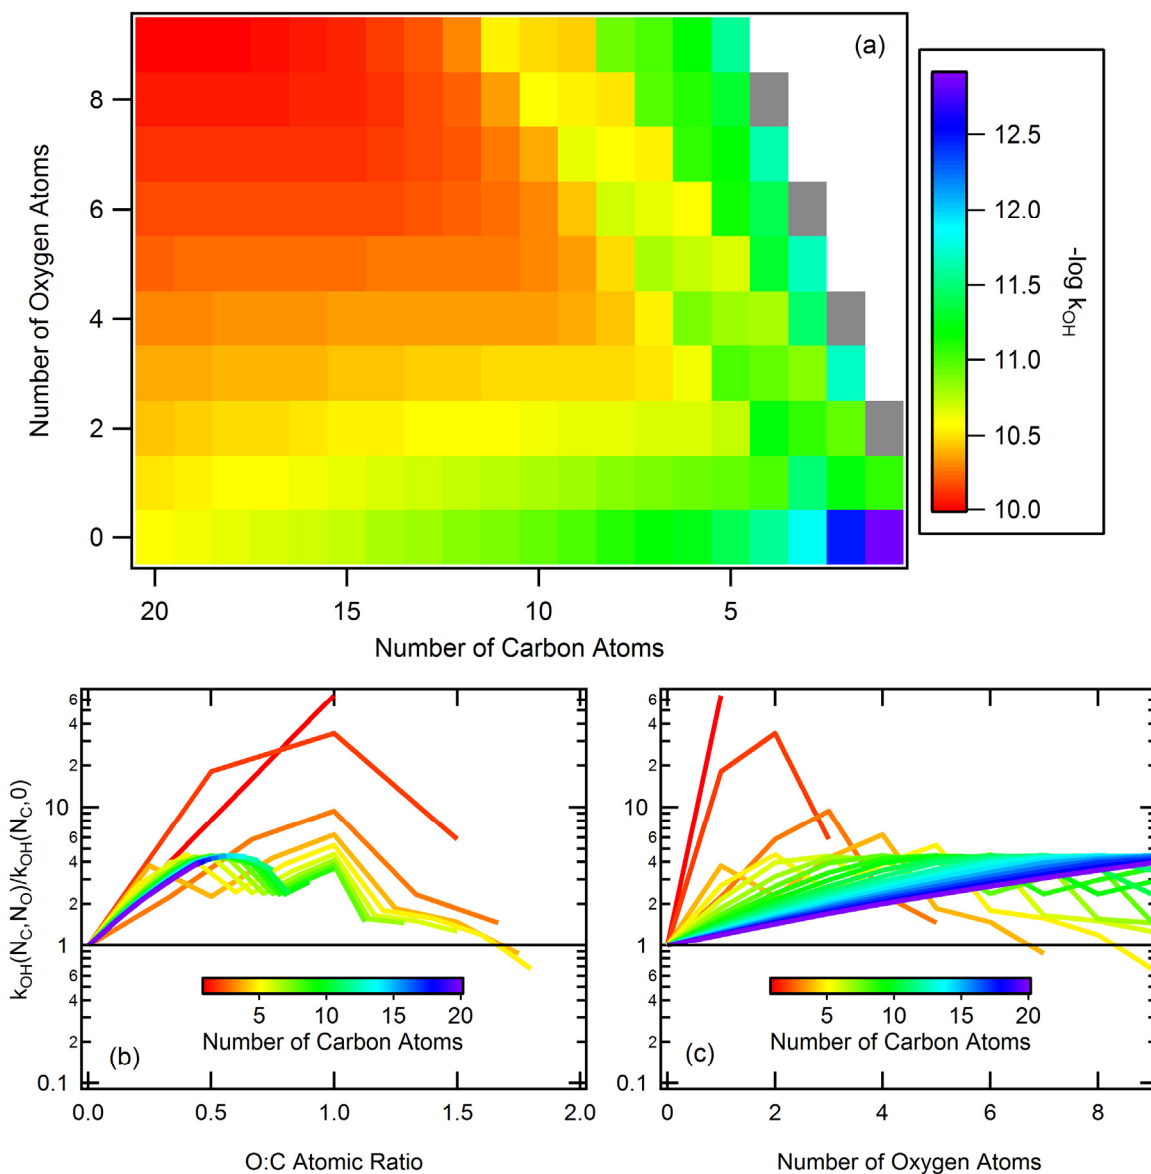

1

2 **Figure S1:** (a) The rate coefficients for reaction with OH from the SOM-reactivity relationship.  
 3 Colors correspond to  $-\log k_{OH}$ , where  $k_{OH}$  is in  $\text{cm}^3 \text{ molecules}^{-1} \text{ s}^{-1}$ . Gray boxes indicate species  
 4 with O:C = 2, which are assumed to be non-reactive. White regions indicate species with O:C >  
 5 2, which are assumed to not exist. (b)  $k_{OH}$  values for each  $N_C$  vs. O:C, normalized by the  $k_{OH}$   
 6 when  $N_O = 0$ . (c)  $k_{OH}$  values for each  $N_C$  vs.  $N_O$ , normalized by the  $k_{OH}$  when  $N_O = 0$ .
